# Supplementary material for: Towards objective identification and tracking of convective outflow boundaries in next-generation geostationary satellite imagery
Source: Copernicus journal article supplement (doi:10.5194/amt-13-1593-2020), 2020-04-02
Supplement: Supplementary file 1 [file amt-13-1593-2020-supplement.zip]

Archive with 3 entries (3 files):
- Sup_Figure8.gif
- Sup_Figure9.gif
- amt-13-1593-2020-supplement-title-page.pdf
