# Supplementary material for: Towards objective identification and tracking of convective outflow boundaries in next-generation geostationary satellite imagery
Source: Copernicus journal article supplement (doi:10.5194/amt-13-1593-2020), 2020-04-02
Supplement: Supplementary file 1 [file amt-13-1593-2020-supplement.zip › amt-13-1593-2020-supplement-title-page.pdf]

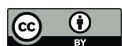

## *Supplement of*

# **Towards objective identification and tracking of convective outflow boundaries in next-generation geostationary satellite imagery**

**Jason M. Apke et al.**

*Correspondence to:* Jason M. Apke ([jason.apke@colostate.edu](mailto:jason.apke@colostate.edu))

- [amt-13-1593-2020-supplement-title-page.pdf](#)
- [Sup\\_Figure8.gif](#)
- [Sup\\_Figure9.gif](#)

The copyright of individual parts of the supplement might differ from the CC BY 4.0 License.
