# Supplementary figures and images for: Towards objective identification and tracking of convective outflow boundaries in next-generation geostationary satellite imagery
Source: Copernicus journal article supplement (doi:10.5194/amt-13-1593-2020), 2020-04-02

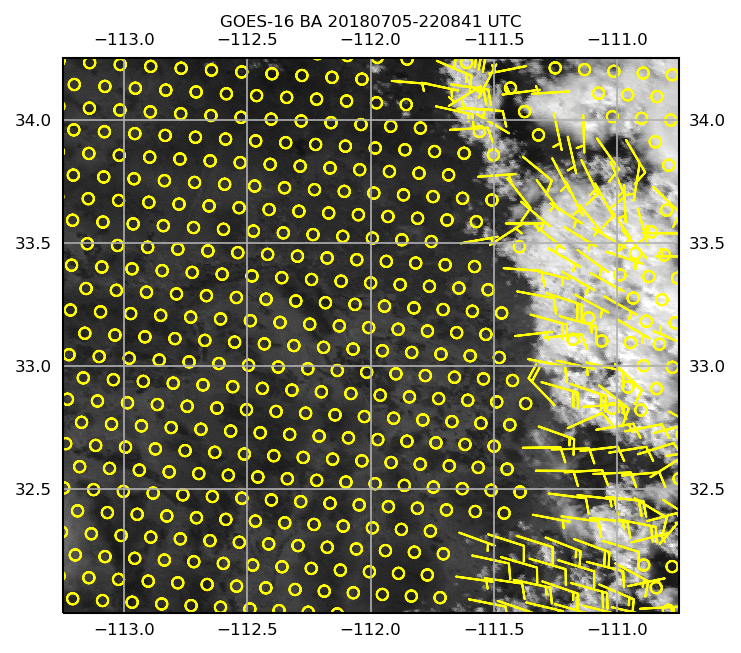

Supplement: Supplementary file 1 [file amt-13-1593-2020-supplement.zip › Sup_Figure8.gif]

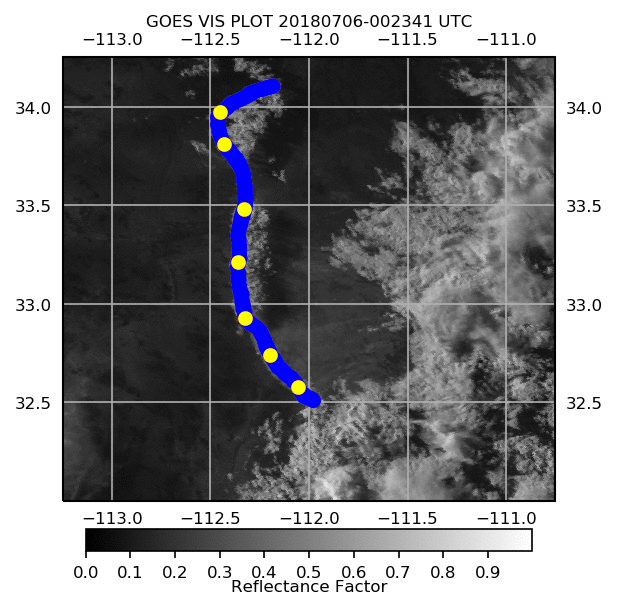

Supplement: Supplementary file 1 [file amt-13-1593-2020-supplement.zip › Sup_Figure9.gif]
